# Supplementary material for: Novel polymeric derivatives of betulin with anticancer activity
Source: PubMed Central journal article supplement — RSC Adv. 2019 Jul 4;9(36):20892–900. doi: 10.1039/c9ra03326b (PMC9065995; doi:10.1039/c9ra03326b), 2019-07-04
Supplement: RA-009-C9RA03326B-s001.pdf [file RA-009-C9RA03326B-s001.pdf]

|                    |                                               |                        |                  |
|--------------------|-----------------------------------------------|------------------------|------------------|
| Injection Date :   | 09-Mar-18, 12:41:39                           |                        |                  |
| Calibration File : | C:\Chem32\GPC\calib\Kalibracja_06_03_2018.CAL |                        |                  |
| Calibration Date : | Tuesday 06-03-18 14:33:40                     |                        |                  |
| Baseline from :    | 8.803 min                                     | Baseline to :          | 12.367 min       |
| Integration from : | 8.803 min                                     | Integration to :       | 12.367 min       |
| MHK - A (Cal.):    | 0.000000E+0                                   | MHK - K (Cal.):        | 1.000000E+0 mg/g |
| Eluent :           | CH <sub>2</sub> Cl <sub>2</sub>               | Flowrate :             | 0.800 ml/min     |
| Concentration :    | 1.000 g/l                                     | Inject volume :        | 100.000 ul       |
| Detector 1 :       | RID1A, Refractive Index Signal                | Delay volume :         | 0.000 ml         |
| Operator :         | SYSTEM                                        | Acquisition interval : | 0.430 sec        |

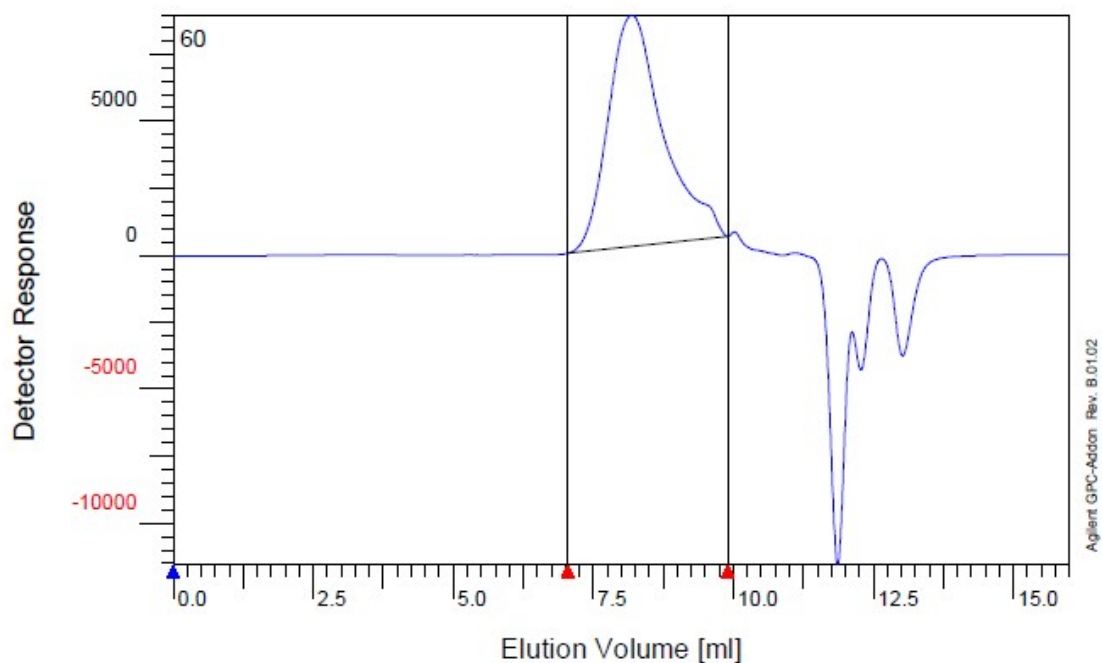

ESI - Figure S1. GPC chromatogram of polyDBB

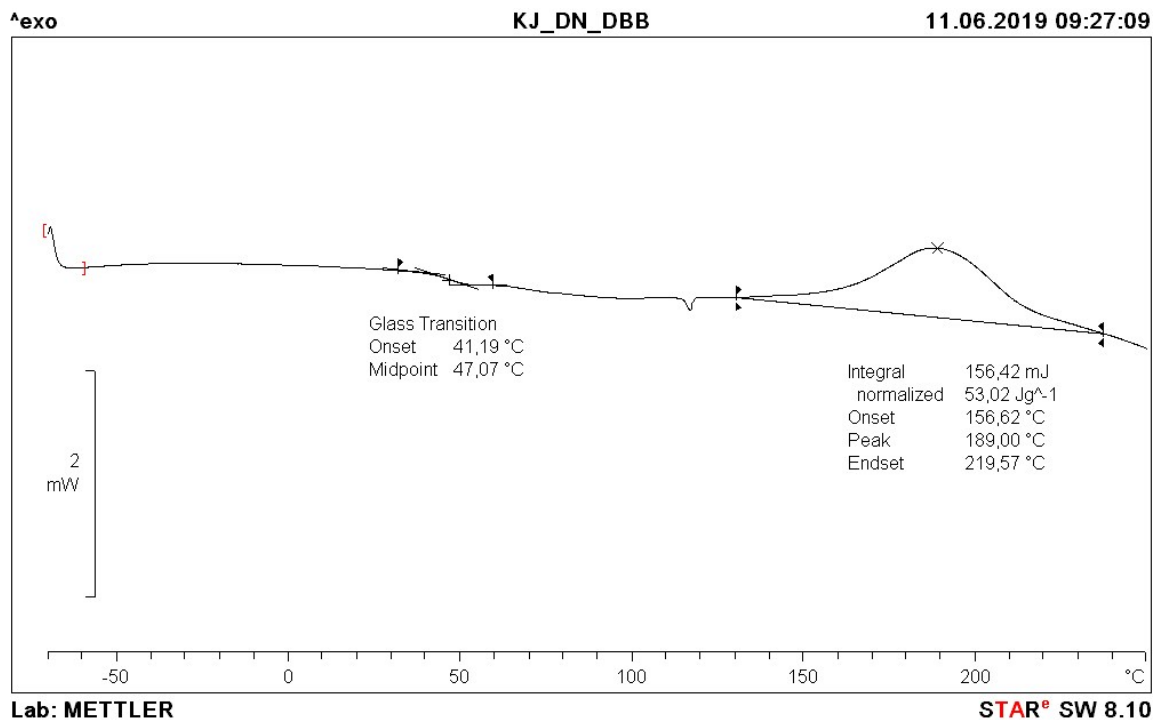

ESI - Figure S2. DSC thermogram of DBB

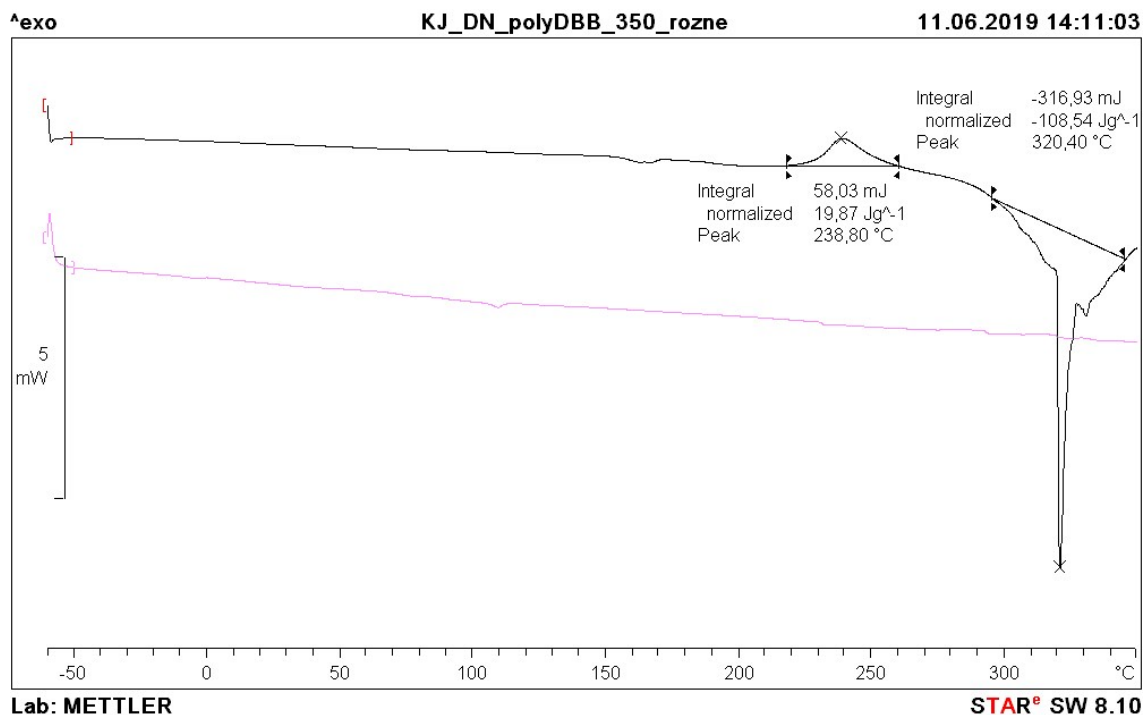

ESI - Figure S3. DSC thermograms of polyDBB (first and second run)

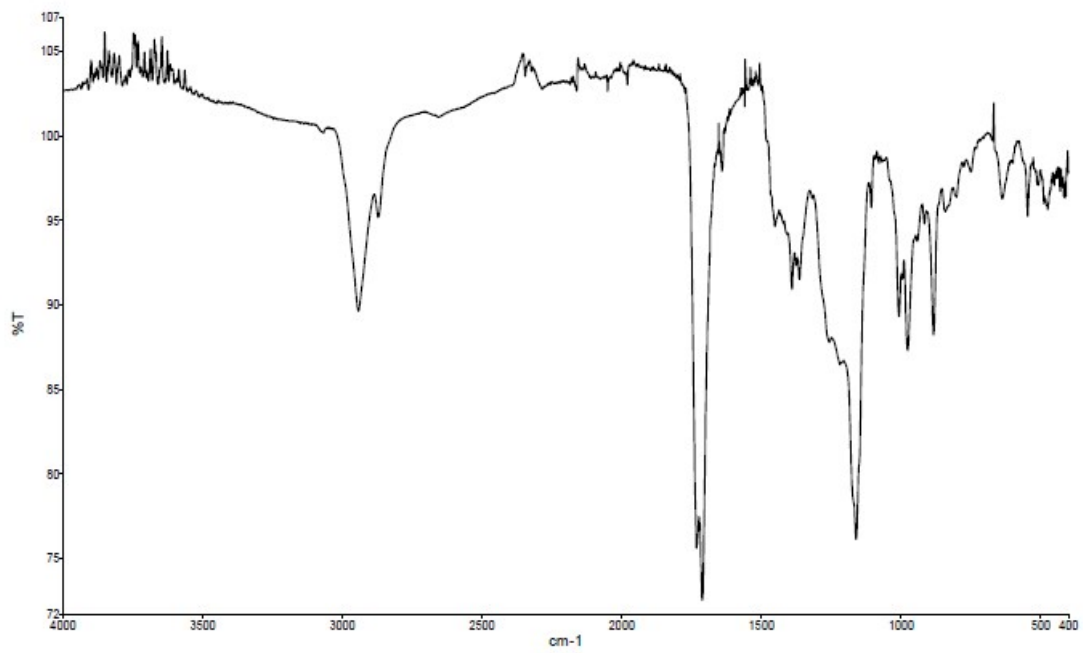

ESI - Figure S4. IR spectrum of DBB

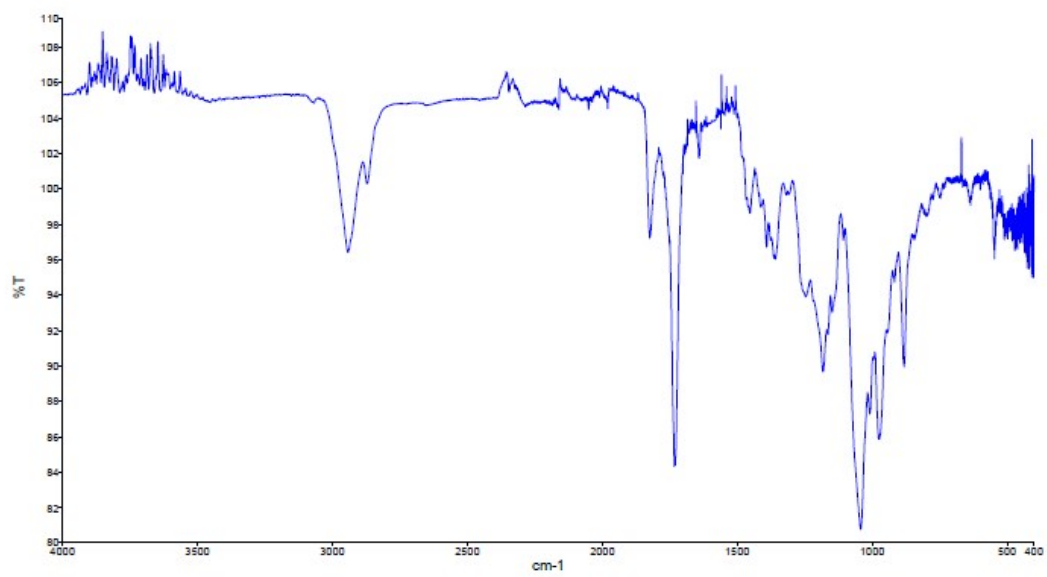

ESI - Figure S5. IR spectrum of polyDBB

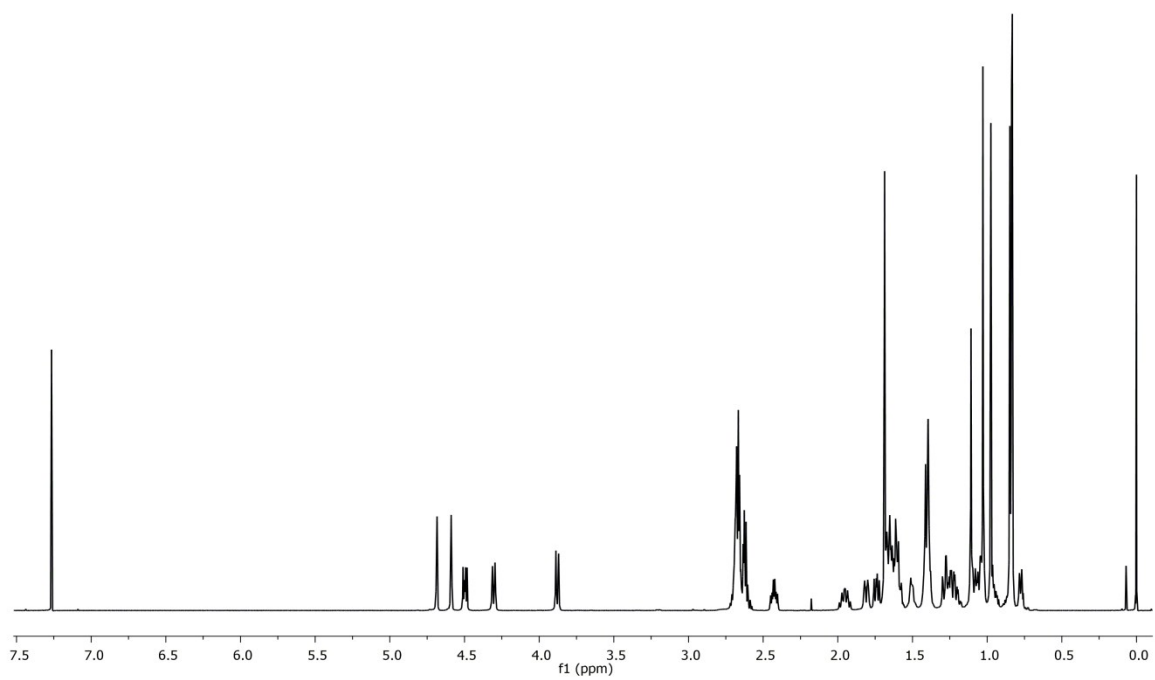

ESI – Figure S6. <sup>1</sup>H NMR spectrum of DBB

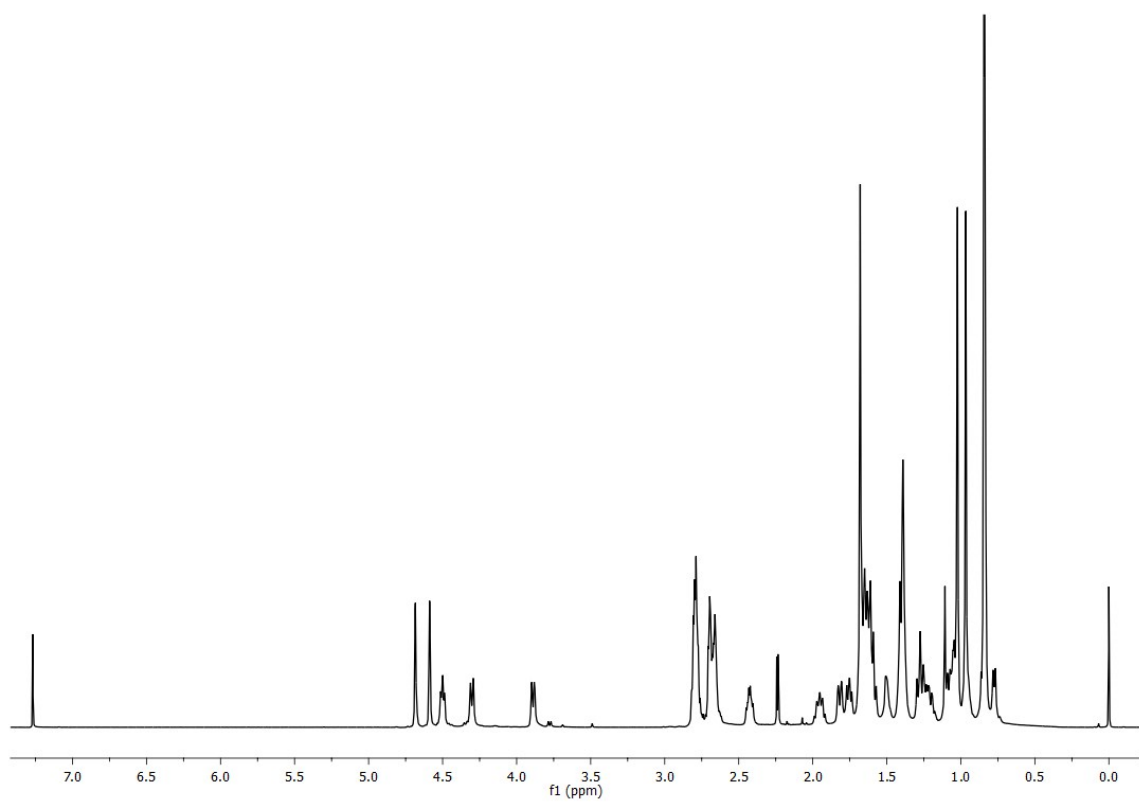

ESI - Figure S7. <sup>1</sup>H NMR spectrum of polyDBB

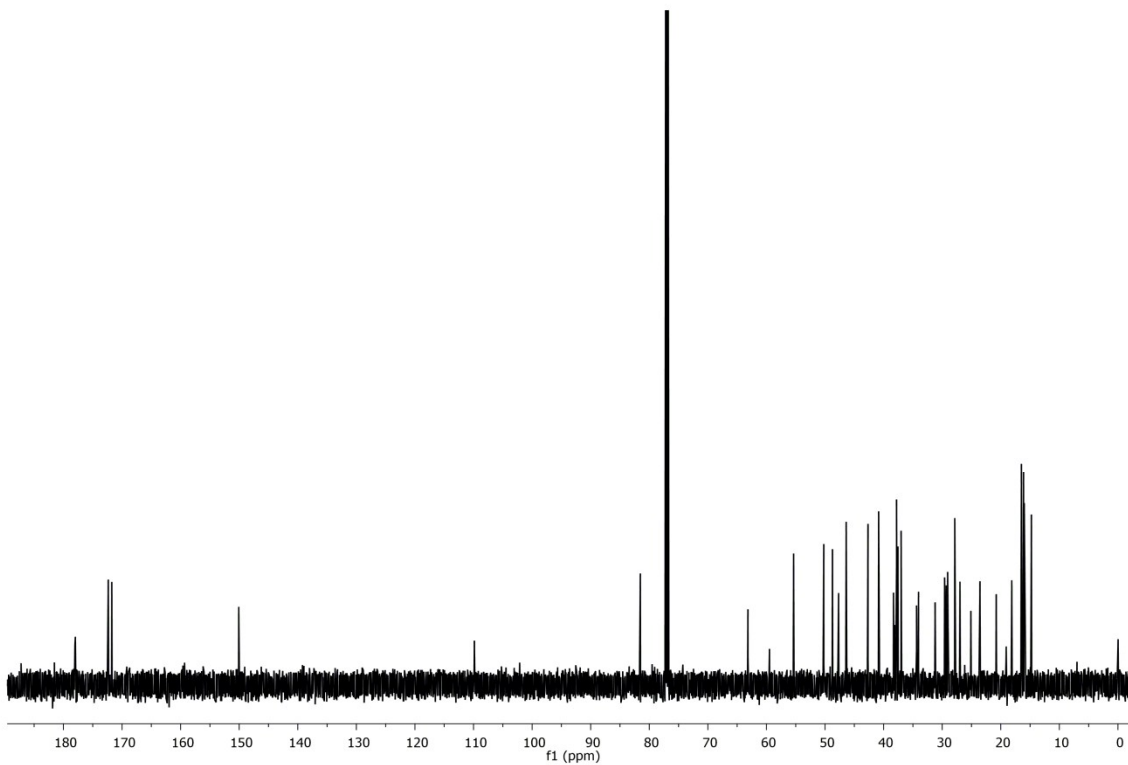

ESI - Figure S8.  $^{13}\text{C}$  NMR spectrum of DBB

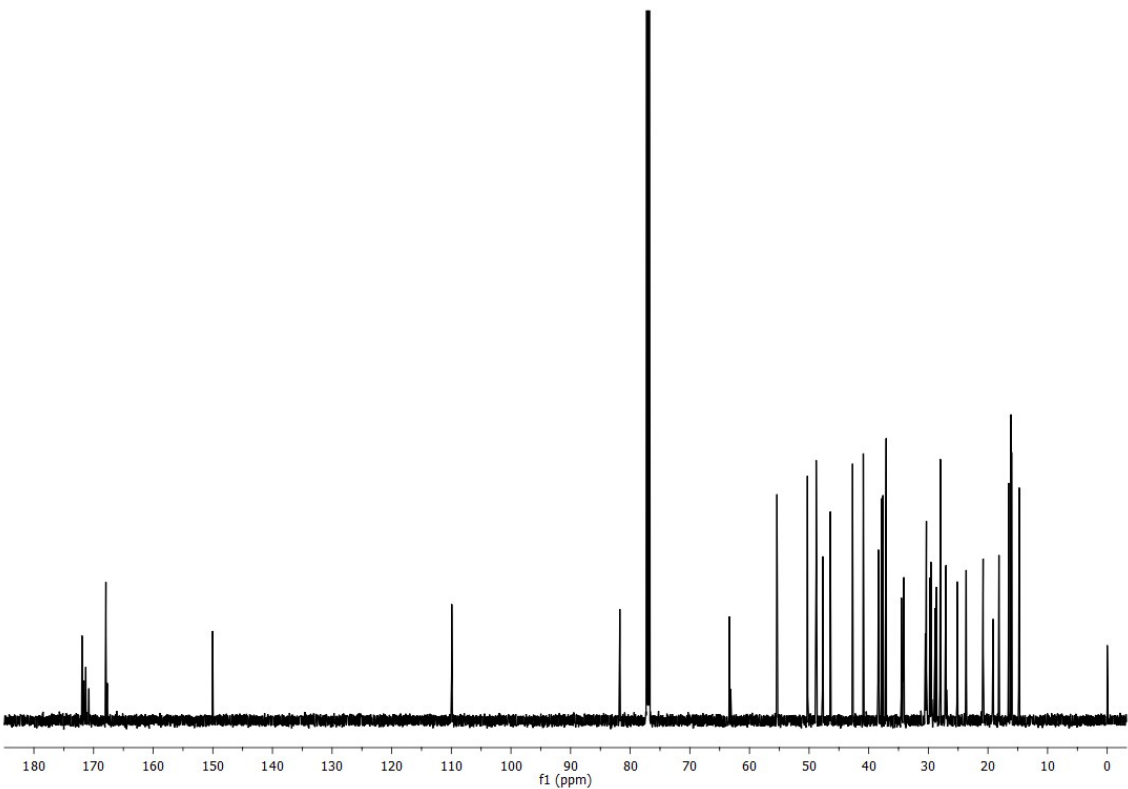

ESI - Figure S9.  $^{13}\text{C}$  NMR spectrum of polyDBB

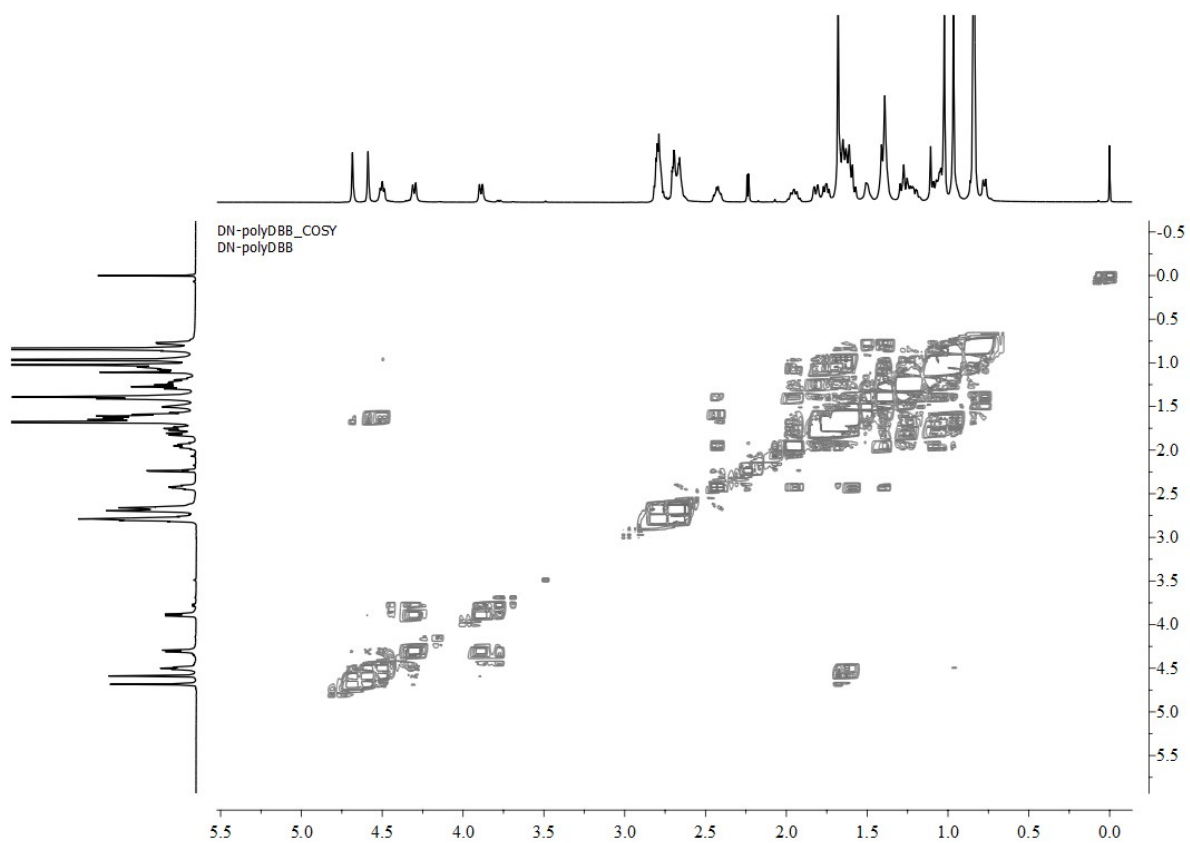

ESI – Figure S10. COSY NMR spectrum of polyDBB

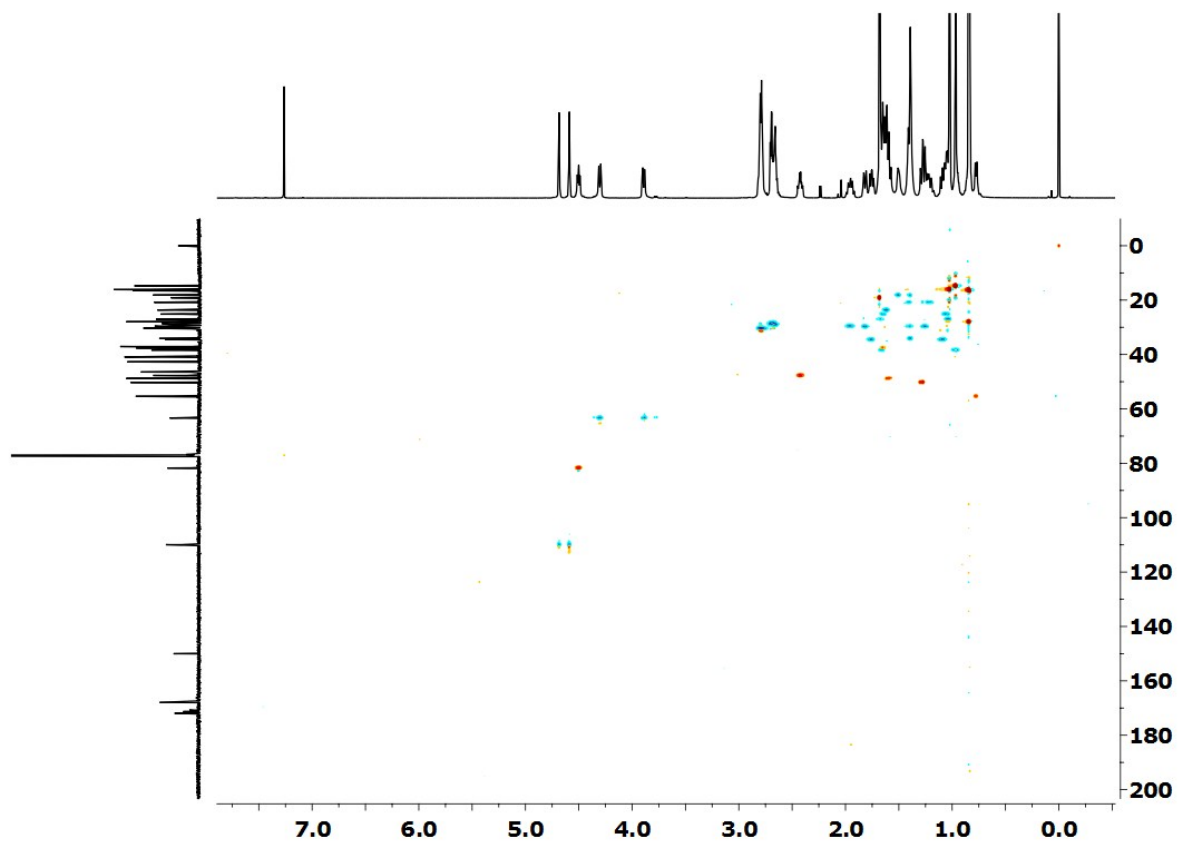

ESI- Figure S11. HSQC NMR spectrum of polyDBB
